# Supplementary material for: Associations Between Change in Outside Time Pre- and Post-COVID-19 Public Health Restrictions and Mental Health: Brief Research Report
Source: PubMed Central journal article supplement (PMC7874172; doi:10.3389/fpubh.2021.619129), 2021-01-26
Supplement: Table_1.pdf [file Table_1.pdf]

## SUPPLEMENTARY MATERIAL

**Supplementary Table 1. Characteristic and Descriptive Statistics**

| Demographic Variables               | n (%)      |               |             |                                |            |
|-------------------------------------|------------|---------------|-------------|--------------------------------|------------|
| <b>Age (years)</b>                  |            |               |             |                                |            |
| 18-24                               | 558 (17%)  |               |             |                                |            |
| 25-34                               | 517 (16%)  |               |             |                                |            |
| 35-44                               | 456 (14%)  |               |             |                                |            |
| 45-54                               | 405 (12%)  |               |             |                                |            |
| 55-64                               | 510 (15%)  |               |             |                                |            |
| 65-74                               | 548 (17%)  |               |             |                                |            |
| 75+                                 | 297 (9%)   |               |             |                                |            |
| <b>Gender</b>                       |            |               |             |                                |            |
| Male                                | 1216 (38%) |               |             |                                |            |
| Female                              | 2045 (62%) |               |             |                                |            |
| <b>Race</b>                         |            |               |             |                                |            |
| White                               | 3086 (94%) |               |             |                                |            |
| Other                               | 205 (6%)   |               |             |                                |            |
| <b>Area of Living</b>               |            |               |             |                                |            |
| Urban                               | 732 (22%)  |               |             |                                |            |
| Suburban                            | 1834 (54%) |               |             |                                |            |
| Rural                               | 725 (22%)  |               |             |                                |            |
| <b>Relationship</b>                 |            |               |             |                                |            |
| Married/In a Relationship           | 2150 (65%) |               |             |                                |            |
| Widowed                             | 102 (3%)   |               |             |                                |            |
| Separated/Divorced                  | 196 (6%)   |               |             |                                |            |
| Never Married                       | 796 (23%)  |               |             |                                |            |
| Other                               | 63 (2%)    |               |             |                                |            |
| <b>Employment Status</b>            |            |               |             |                                |            |
| No Change in Work                   | 834 (25%)  |               |             |                                |            |
| Working from Home                   | 1352 (41%) |               |             |                                |            |
| Was Not Working Before              | 798 (24%)  |               |             |                                |            |
| Lost employment due to pandemic     | 307 (9%)   |               |             |                                |            |
| <b>Public Health Restriction</b>    |            |               |             |                                |            |
| Quarantined/Self-Isolating          | 591 (17%)  |               |             |                                |            |
| Shelter in Place/Stay at Home Order | 1570 (47%) |               |             |                                |            |
| Social Distancing                   | 1130 (34%) |               |             |                                |            |
| <b>Physical Activity</b>            |            |               |             |                                |            |
| Maintained High                     | 2528 (77%) |               |             |                                |            |
| Maintained Low                      | 238 (7%)   |               |             |                                |            |
| Increased MVPA                      | 145 (4%)   |               |             |                                |            |
| Decreased MVPA                      | 380 (12%)  |               |             |                                |            |
| <b>Chronic Health Condition</b>     |            |               |             |                                |            |
| Previously                          | 170 (5%)   |               |             |                                |            |
| Currently                           | 1034 (31%) |               |             |                                |            |
| Never                               | 2087 (63%) |               |             |                                |            |
|                                     | <b>Min</b> | <b>Median</b> | <b>Mean</b> | <b>3<sup>rd</sup> Quartile</b> | <b>Max</b> |
| <b>Independent Variables (IV)</b>   |            |               |             |                                |            |
| Outside Time <sup>a</sup>           |            |               |             |                                |            |
| Pre-COVID                           | 0.0        | 120.0         | 124.5       | 180.0                          | 960.0      |
| Post-COVID                          | 0.0        | 60.0          | 103.3       | 120.0                          | 960.0      |
| <b>Dependent Variables (DV)</b>     |            |               |             |                                |            |
| Stress <sup>b</sup>                 | 0.0        | 6.0           | 6.1         | 8.0                            | 16.0       |
| Positive Mental Health <sup>c</sup> | 7.0        | 24.0          | 24.2        | 27.0                           | 35.0       |

<sup>a</sup>Average minutes per day before (Pre-Outside Time) and after (Post-Outside Time) implementation of COVID-19 public health restrictions.

<sup>b</sup>Sum of scores on the Perceived Stress Scale-4 subscales range from 1 (Never) to 5 (Very Often).

<sup>c</sup>Sum of scores on the Short Warwick-Edinburgh Mental Wellbeing Scale subscales range from 1 (None of the Time) to 5 (All of the Time).
