# Supplementary material for: Associations Between Change in Outside Time Pre- and Post-COVID-19 Public Health Restrictions and Mental Health: Brief Research Report
Source: PubMed Central journal article supplement (PMC7874172; doi:10.3389/fpubh.2021.619129), 2021-01-26
Supplement: Table_2.pdf [file Table_2.pdf]

**Supplementary Table 2. Model 1 and 2 ANOVA results**

|                                                                            | Model 1 (Stress) |      |        |         | Model 2 (PMH) |      |       |         |
|----------------------------------------------------------------------------|------------------|------|--------|---------|---------------|------|-------|---------|
|                                                                            | B                | SE   | t      | p       | B             | SE   | t     | p       |
| <b>Outside Time (ref: decreased outside time)</b>                          |                  |      |        |         |               |      |       |         |
| Increase Outside Time                                                      | -0.51            | 0.13 | -4.10  | <0.001* | 0.89          | 0.19 | 4.67  | <0.001* |
| Maintained Outside Time                                                    | -0.59            | 0.12 | -5.00  | <0.001* | 1.17          | 0.18 | 6.56  | <0.001* |
| <b>Age (ref: 18-24 yrs)</b>                                                |                  |      |        |         |               |      |       |         |
| 25-34 yrs.                                                                 | -0.73            | 0.19 | -4.00  | <0.001* | 0.96          | 0.28 | 3.43  | <0.001* |
| 34-44 yrs.                                                                 | -0.91            | 0.21 | -4.40  | <0.001* | 1.16          | 0.31 | 3.72  | <0.001* |
| 45-54 yrs.                                                                 | -1.42            | 0.21 | -6.72  | <0.001* | 2.11          | .32  | 6.64  | <0.001* |
| 55-64 yrs.                                                                 | -1.84            | 0.21 | -8.90  | <0.001* | 3.36          | 0.31 | 10.84 | <0.001* |
| 65-74 yrs.                                                                 | -2.51            | 0.22 | -11.50 | <0.001* | 4.25          | 0.33 | 13.10 | <0.001* |
| 75+ yrs.                                                                   | -2.32            | 0.26 | -9.00  | <0.001* | 4.79          | 0.39 | 12.40 | <0.001* |
| <b>Gender (ref: male)</b>                                                  |                  |      |        |         |               |      |       |         |
| Female                                                                     | 0.68             | 0.10 | 6.52   | <0.001* | -1.07         | 0.15 | -6.89 | <0.001* |
| Transgender male                                                           | 0.83             | 0.86 | 0.96   | 0.33    | 0.60          | 1.29 | 0.46  | 0.64    |
| Transgender female                                                         | 1.81             | 0.87 | 2.10   | 0.036*  | -0.98         | 1.30 | -0.76 | 0.45    |
| Gender non-conforming                                                      | 1.30             | 0.87 | 1.50   | 0.13    | -1.55         | 1.30 | -1.20 | 0.23    |
| <b>Race (ref: white)</b>                                                   |                  |      |        |         |               |      |       |         |
| Non-white race                                                             | 0.20             | 0.20 | 1.04   | 0.30    | -0.06         | 0.29 | -0.22 | 0.82    |
| <b>Relationship Status (ref: married)</b>                                  |                  |      |        |         |               |      |       |         |
| Widowed                                                                    | -0.29            | 0.29 | -1.02  | 0.31    | -0.88         | 0.43 | -2.07 | 0.39*   |
| Separated/Divorced                                                         | -0.13            | 0.20 | -0.61  | 0.54    | -0.44         | 0.31 | -1.43 | 0.15    |
| Never Married                                                              | 0.22             | 0.15 | 1.47   | 0.14    | -0.75         | 0.22 | -3.32 | <0.001* |
| Other                                                                      | 0.76             | 0.36 | 2.12   | <0.034* | -1.80         | 0.54 | -3.35 | <0.001* |
| Decline to Answer                                                          | 0.50             | 0.83 | 0.56   | 0.58    | 0.68          | 1.24 | 0.55  | 0.58    |
| <b>Children (ref: yes, children in household)</b>                          |                  |      |        |         |               |      |       |         |
| Children (no)                                                              | -0.21            | 0.14 | -1.57  | 0.12    | -0.26         | 0.20 | -1.26 | 0.21    |
| <b>COVID-19 related employment changes (ref: no change in employment)</b>  |                  |      |        |         |               |      |       |         |
| Working from Home                                                          | 0.20             | 0.13 | 1.60   | 0.11    | -0.26         | 0.19 | -1.40 | 0.16    |
| Not working previously                                                     | 0.12             | 0.15 | 0.82   | 0.41    | -0.02         | 0.22 | -0.11 | 0.91    |
| Lost employment                                                            | 0.99             | 0.19 | 5.26   | <0.001* | -0.97         | 0.28 | -3.43 | <0.001* |
| <b>COVID-19 Public health restriction (ref: quarantine/self-isolation)</b> |                  |      |        |         |               |      |       |         |
| Shelter in Place                                                           | -0.11            | 0.13 | -0.86  | 0.39    | 0.07          | 1.01 | 0.36  | 0.72    |
| Social Distancing                                                          | -0.25            | 0.14 | -1.75  | 0.08    | 0.12          | 0.21 | 0.60  | 0.55    |
| <b>Activity Level (ref: maintained low)</b>                                |                  |      |        |         |               |      |       |         |
| Increased MVPA                                                             | -0.30            | 0.29 | -1.05  | 0.29    | 0.61          | 0.43 | 1.41  | 0.16    |
| Decreased MVPA                                                             | 0.33             | 0.23 | 1.47   | 0.14    | -1.02         | 0.34 | -3.01 | 0.003*  |
| Maintained high                                                            | -0.35            | 0.19 | -1.86  | 0.06    | 0.40          | 0.28 | 1.45  | 0.15    |
| <b>Community Environment (ref: urban)</b>                                  |                  |      |        |         |               |      |       |         |
| Suburban                                                                   | -0.03            | 0.12 | -0.24  | 0.81    | -0.11         | 0.18 | -0.60 | 0.55    |
| Rural                                                                      | -0.11            | 0.15 | -0.76  | 0.45    | -0.01         | 0.22 | -0.04 | 0.96    |

Ref = reference group; maintained low = not meeting MVPA guidelines pre or post COVID-19 restrictions; maintained high = meeting MVPA guidelines pre and post COVID-19 restrictions; \* = p < 0.05
